# Supplementary material
Source: PubMed Central journal article supplement (PMC9649913)
Supplement: ehab911_supplementary_data.pdf [file ehab911_supplementary_data.pdf]

ONLINE SUPPLEMENTS FOR

**Heart Failure with Preserved Ejection Fraction  
is Associated with Increased Mortality and  
Heart Failure Readmissions Even When  
Natriuretic Peptide Levels are Normal**

Frederik H. Verbrugge M.D. Ph.D.<sup>1,2,3</sup>, Kazunori Omote M.D. Ph.D.<sup>1</sup>,  
Yogesh N. V. Reddy M.B.B.S. M.Sc.<sup>1</sup>, Hidemi Sorimachi M.D. Ph.D.<sup>1</sup>,  
Masaru Obokata M.D. Ph.D.<sup>1</sup>, Barry A. Borlaug M.D.<sup>1</sup>

1. Department of Cardiovascular Diseases, Mayo Clinic, Rochester, MN, United States
2. Centre for Cardiovascular Diseases, University Hospital Brussels, Brussels, Belgium
3. Biomedical Research Institute, Faculty of Medicine and Life Sciences, Hasselt University, Hasselt, Belgium

**Address for correspondence:**

Barry A. Borlaug, MD

Mayo Clinic and Foundation

200 First Street SW, Rochester, MN 55905

Phone: +1 (507) 284-4442 | Fax: +1 (507) 266-0228 | Email: borlaug.barry@mayo.edu

## Table of Contents

P4: Supplementary Table 1. Baseline characteristics of control subjects with normal versus high natriuretic peptide levels

P5: Supplementary Table S2. Univariate and multivariate models for all-cause mortality

P6: Supplementary Table S3. Univariate and multivariate models for heart failure readmissions

P7-8: Supplementary Table S4. Baseline characteristics of the study population in sensitivity analysis matched for age, hypertension, diabetes and atrial fibrillation

P9-10: Supplementary Table S5. Cardiac structure and function in sensitivity analysis matched for age, hypertension, diabetes and atrial fibrillation

P11-12: Supplementary Table S6. Invasive hemodynamic assessment at rest and during exercise in sensitivity analysis matched for age, hypertension, diabetes and atrial fibrillation

P13-14: Supplementary Table S7. Baseline characteristics of the study population in sensitivity analysis with elevated NT proBNP cut-off >220 ng/L in sinus rhythm and >660 ng/L in atrial fibrillation

P15-16: Supplementary Table S8. Cardiac structure and function in sensitivity analysis with elevated NT proBNP cut-off >220 ng/L in sinus rhythm and >660 ng/L in atrial fibrillation

P17-18: Supplementary Table S9:

P19: Supplementary Figure S1. Study flowchart.

P20: Supplementary Figure S2. Cardiac output increase from rest to exercise as a function of left ventricular preload reflected by LVTMP (Bars indicating mean with standard deviations).

P21: Supplementary Figure S3: Freedom from all-cause mortality or heart failure readmissions in control subjects, patients with HFpEF and NT proBNP <125 ng/L versus  $\geq$ 125 ng/L in sensitivity analysis matched for age, hypertension, diabetes and atrial fibrillation.

P22: Supplementary Figure S4: (A.) Left ventricular mass index, (B.) left atrial volume index, (C.) septal e' velocity, and (D.) septal E/e' ratio in control subjects (black dots), patients with HFpEF and low NT proBNP (green squares), and patients with HFpEF and high NT proBNP (red triangles). Sensitivity analysis with elevated NT proBNP cut-off >220 ng/L in sinus rhythm and >660 ng/L in atrial fibrillation.

P23: Supplementary Figure S5: (A.) RV dilation, (B.) TAPSE, (C.) MR, and (D.) TR in control subjects (black dots), patients with HFpEF and low NT proBNP (green squares), and patients with HFpEF and high NT proBNP (red triangles). Sensitivity analysis with elevated NT proBNP cut-off >220 ng/L in sinus rhythm and >660 ng/L in atrial fibrillation.

P24: Supplementary Figure S6. (A.) mPAP at rest; (B.) PVR at rest; (C.) mPAP at peak exercise; and (D.) PVR at peak exercise in control subjects (black dots), patients with HFpEF and low NT proBNP (green squares), and patients with HFpEF and high NT proBNP (red triangles). Sensitivity analysis with elevated NT proBNP cut-off >220 ng/L in sinus rhythm and >660 ng/L in atrial fibrillation.

P25: Supplementary Figure S7. Freedom from all-cause mortality or heart failure readmission in control subjects, patients with HFpEF and low NT proBNP, and patients with HFpEF and high NT proBNP. Sensitivity analysis with elevated NT proBNP cut-off >220 ng/L in sinus rhythm and >660 ng/L in atrial fibrillation.

**Supplementary Table S1. Baseline characteristics of control subjects with normal versus high natriuretic peptide levels**

|                                                            | <b>Control subjects<br/>with normal NP<br/>(n = 133)</b> | <b>Control subjects<br/>with high NP<br/>(n = 28)</b> | <b>P-value</b> |
|------------------------------------------------------------|----------------------------------------------------------|-------------------------------------------------------|----------------|
| Age (years)                                                | 53 ± 14                                                  | 60 ± 12                                               | 0.015          |
| Female, n (%)                                              | 71 (54%)                                                 | 18 (64%)                                              | 0.292          |
| Body mass index (kg/m <sup>2</sup> )                       | 27.9 ± 5.3                                               | 26.8 ± 4.7                                            | 0.332          |
| Left ventricular ejection fraction (%)                     | 65 ± 6                                                   | 65 ± 5                                                | 0.837          |
| Comorbidities, n (%)                                       |                                                          |                                                       |                |
| Hypertension                                               | 87 (65%)                                                 | 15 (54%)                                              | 0.237          |
| Diabetes                                                   | 19 (14%)                                                 | 2 (7%)                                                | 0.308          |
| Obesity                                                    | 43 (32%)                                                 | 8 (29%)                                               | 0.698          |
| Coronary artery disease                                    | 21 (16%)                                                 | 8 (29%)                                               | 0.110          |
| Sinus/paroxysmal/permanent AF                              | 126 (95%)/7 (5%)/0 (0%)                                  | 26 (93%)/1 (4%)/1 (4%)                                | 0.087          |
| COPD                                                       | 8 (6%)                                                   | 1 (4%)                                                | 0.609          |
| Laboratory results                                         |                                                          |                                                       |                |
| NT-proBNP (ng/L)†                                          | 52 (25-80)                                               | 219 (159-468)                                         | N/A            |
| Hemoglobin (g/dL)                                          | 13.7 ± 1.5                                               | 13.3 ± 1.5                                            | 0.241          |
| eGFR (mL/min/1.73m <sup>2</sup> )                          | 81 ± 20                                                  | 73 ± 17                                               | 0.069          |
| Medication use, n (%)                                      |                                                          |                                                       |                |
| Renin-angiotensin system blocker                           | 35 (26%)                                                 | 7 (25%)                                               | 0.885          |
| Beta blocker                                               | 30 (23%)                                                 | 8 (29%)                                               | 0.496          |
| Diuretic                                                   | 28 (21%)                                                 | 8 (29%)                                               | 0.386          |
| Continuous H <sub>2</sub> FPEF score<br>probability (%)†,‡ | 34 (15-48)                                               | 36 (23-60)                                            | 0.304          |
| HFA-PEFF score†,‡                                          | 1 (0-3)                                                  | 3 (1-4)                                               | 0.011          |

†Reported as median (interquartile range)

‡Continuous H<sub>2</sub>FPEF score probability as determined from Reference [4] and HFA-PEFF score as determined from Reference [12]

AF, atrial fibrillation; COPD, chronic obstructive pulmonary disease; eGFR, estimated glomerular filtration rate according to the Chronic Kidney Disease Epidemiology Collaboration formula; HFpEF, heart failure with preserved ejection fraction; NP, natriuretic peptides; NT-proBNP, N-terminal pro-hormone of B-type natriuretic peptide.

**Supplementary Table S2. Univariate and multivariate models for all-cause mortality**

|                                          | Univariate model |                 | Multivariate model |                 |
|------------------------------------------|------------------|-----------------|--------------------|-----------------|
|                                          | HR (95% CI)      | <i>P</i> -value | HR (95% CI)        | <i>P</i> -value |
| Normal versus high NP HFpEF              | 0.38 (0.19–0.73) | 0.004           | 0.50 (0.25–1.01)   | 0.052           |
| Normal NP HFpEF versus control subjects  | 3.04 (0.97–9.57) | 0.057           | 2.36 (0.70–7.90)   | 0.164           |
| Age, per 1 year                          | 1.07 (1.04–1.10) | <0.001          | 1.05 (1.02–1.08)   | 0.004           |
| Female gender                            | 0.64 (0.38–1.08) | 0.094           | 0.58 (0.34–0.99)   | 0.044           |
| Body mass index, per 1 kg/m <sup>2</sup> | 1.00 (0.96–1.03) | 0.883           | 1.00 (0.95–1.04)   | 0.822           |

HFpEF, heart failure with preserved ejection fraction; NP, natriuretic peptides.

**Supplementary Table S3. Univariate and multivariate models for heart failure readmissions**

|                                          | Univariate model |                 | Multivariate model |                 |
|------------------------------------------|------------------|-----------------|--------------------|-----------------|
|                                          | HR (95% CI)      | <i>P</i> -value | HR (95% CI)        | <i>P</i> -value |
| Normal versus high NP HFpEF              | 0.36 (0.19–0.71) | <0.001          | 0.48 (0.24–0.96)   | 0.039           |
| Normal NP HFpEF versus controls subjects | 3.00 (0.95–9.43) | 0.061           | 2.21 (0.66–7.41)   | 0.199           |
| Age, per 1 year                          | 1.07 (1.04–1.10) | <0.001          | 1.05 (1.02–1.08)   | 0.005           |
| Female gender                            | 0.69 (0.41–1.16) | 0.160           | 0.62 (0.36–1.04)   | 0.071           |
| Body mass index, per 1 kg/m <sup>2</sup> | 1.00 (0.96–1.04) | 0.982           | 1.00 (0.96–1.05)   | 0.857           |

HFpEF, heart failure with preserved ejection fraction; NP, natriuretic peptides.

**Supplementary Table S4. Baseline characteristics of the study population in sensitivity analysis matched for age, hypertension, diabetes and atrial fibrillation**

|                                        | <b>Control subjects<br/>without HFpEF<br/>(n = 86)</b> | <b>HFpEF with<br/>normal NP<br/>(n = 103)</b> | <b>HFpEF with<br/>high NP<br/>(n = 49)</b> | <b>P-value for HFpEF<br/>with normal NP<br/>versus controls</b> | <b>P-value for HFpEF<br/>with normal<br/>versus high NP</b> |
|----------------------------------------|--------------------------------------------------------|-----------------------------------------------|--------------------------------------------|-----------------------------------------------------------------|-------------------------------------------------------------|
| Age (years)                            | 57 ± 12                                                | 58 ± 10                                       | 57 ± 8                                     | N/A                                                             | N/A                                                         |
| Men/women                              | 55/45%                                                 | 48/52%                                        | 31/69%                                     | 0.332                                                           | 0.049                                                       |
| Body mass index (kg/m <sup>2</sup> )   | 29.0 ± 5.2                                             | 35.9 ± 7.6                                    | 35.3 ± 9.9                                 | <0.001                                                          | 0.877                                                       |
| Left ventricular ejection fraction (%) | 66 ± 6                                                 | 66 ± 5                                        | 64 ± 6                                     | N/A                                                             | N/A                                                         |
| <b>Comorbidities</b>                   |                                                        |                                               |                                            |                                                                 |                                                             |
| Hypertension                           | 74 (86%)                                               | 90 (87%)                                      | 42 (86%)                                   | N/A                                                             | N/A                                                         |
| Diabetes                               | 21 (24%)                                               | 26 (25%)                                      | 12 (24%)                                   | N/A                                                             | N/A                                                         |
| Obesity                                | 36 (42%)                                               | 83 (81%)                                      | 33 (67%)                                   | <0.001                                                          | 0.073                                                       |
| Coronary artery disease*               | 22 (26%)                                               | 31 (30%)                                      | 9 (18%)                                    | N/A                                                             | N/A                                                         |
| Atrial fibrillation                    | 7 (8%)                                                 | 8 (8%)                                        | 4 (8%)                                     | N/A                                                             | N/A                                                         |
| COPD*                                  | 5 (6%)                                                 | 16 (16%)                                      | 7 (14%)                                    | N/A                                                             | N/A                                                         |
| <b>Laboratory results</b>              |                                                        |                                               |                                            |                                                                 |                                                             |
| NT-proBNP (ng/L)†                      | 60 (25-99)                                             | 56 (30-79)                                    | 370 (194-816)                              | 0.761                                                           | <0.001                                                      |
| Hemoglobin (g/dL)                      | 14.0 ± 1.4                                             | 13.4 ± 1.3                                    | 12.8 ± 1.7                                 | 0.023                                                           | 0.049                                                       |
| eGFR (mL/min/1.73m <sup>2</sup> )      | 77 ± 19                                                | 76 ± 17                                       | 69 ± 22                                    | N/A                                                             | N/A                                                         |

|                                      |            |            |            |        |        |  |
|--------------------------------------|------------|------------|------------|--------|--------|--|
| Medication use                       |            |            |            |        |        |  |
| Renin-angiotensin system blocker*    | 30 (35%)   | 43 (42%)   | 16 (33%)   | N/A    | N/A    |  |
| Beta blocker                         | 27 (31%)   | 36 (35%)   | 28 (57%)   | 0.606  | 0.010  |  |
| Diuretic                             | 25 (29%)   | 52 (50%)   | 26 (53%)   | 0.003  | 0.767  |  |
| Continuous H <sub>2</sub> FPEF score | 39 (22-59) | 63 (47-83) | 70 (47-87) | <0.001 | 0.701  |  |
| probability (%)†,‡                   |            |            |            |        |        |  |
| HFA-PEFF score†,‡                    | 2 (1-3)    | 2 (1-3)    | 3 (2-5)    | 0.454  | <0.001 |  |

All 3-group comparisons were first tested using ANOVA (or Kruskal Walls H test for nonparametric distributions), if the results of this test were not significant (indicated by an asterisk), no further between group testing was performed and individual group comparison p values are indicated as N/A.

†Reported as median (interquartile range)

‡Continuous H<sub>2</sub>FPEF score probability as determined from Reference [4] and HFA-PEFF score as determined from Reference [12]

AF, atrial fibrillation; COPD, chronic obstructive pulmonary disease; eGFR, estimated glomerular filtration rate according to the Chronic Kidney Disease Epidemiology Collaboration formula; HFpEF, heart failure with preserved ejection fraction; NP, natriuretic peptides; NT-proBNP, N-terminal pro-hormone of B-type natriuretic peptide.



**Supplementary Table S5. Cardiac structure and function in sensitivity analysis matched for age, hypertension, diabetes and atrial fibrillation**

|                                                  | <b>Control subjects<br/>without HFpEF<br/>(n = 86)</b> | <b>HFpEF with<br/>normal NP<br/>(n = 103)</b> | <b>HFpEF with<br/>high NP<br/>(n = 49)</b> | <b>P-value for HFpEF<br/>with normal NP<br/>versus controls</b> | <b>P-value for HFpEF<br/>with normal versus<br/>high NP</b> |
|--------------------------------------------------|--------------------------------------------------------|-----------------------------------------------|--------------------------------------------|-----------------------------------------------------------------|-------------------------------------------------------------|
| <b>Dimensions</b>                                |                                                        |                                               |                                            |                                                                 |                                                             |
| Interventricular septal thickness (mm)           | 10.0 ± 1.4                                             | 10.7 ± 1.9                                    | 10.7 ± 2.0                                 | 0.012                                                           | 0.983                                                       |
| Posterior wall thickness (mm)*                   | 9.7 ± 1.5                                              | 10.2 ± 1.4                                    | 10.2 ± 1.6                                 | N/A                                                             | N/A                                                         |
| Left ventricular end-diastolic diameter (mm)*    | 48 ± 5                                                 | 49 ± 5                                        | 50 ± 4                                     | N/A                                                             | N/A                                                         |
| Left ventricular end-systolic diameter (mm)*     | 31 ± 4                                                 | 31 ± 4                                        | 32 ± 4                                     | N/A                                                             | N/A                                                         |
| Left atrial volume (mL)                          | 54 (43-68)                                             | 55 (46-66)                                    | 66 (52-81)                                 | 0.613                                                           | 0.040                                                       |
| Left atrial volume index (mL/m <sup>2</sup> )    | 27 (21-32)                                             | 25 (22-32)                                    | 31 (25-38)                                 | 0.623                                                           | 0.004                                                       |
| <b>Left ventricular hypertrophy indices</b>      |                                                        |                                               |                                            |                                                                 |                                                             |
| Relative wall thickness (mm)*                    | 0.41 ± 0.07                                            | 0.41 ± 0.06                                   | 0.41 ± 0.06                                | N/A                                                             | N/A                                                         |
| Concentric remodelling†, n (%)                   | 33 (38%)                                               | 41 (40%)                                      | 21 (43%)                                   | N/A                                                             | N/A                                                         |
| Left ventricular mass (g)                        | 171 ± 50                                               | 194 ± 58                                      | 196 ± 64                                   | 0.021                                                           | 0.973                                                       |
| Left ventricular mass index (g/m <sup>2</sup> )* | 84 ± 19                                                | 86 ± 19                                       | 91 ± 24                                    | N/A                                                             | N/A                                                         |
| Left ventricular hypertrophy‡, n (%)             | 37 (43%)                                               | 55 (53%)                                      | 27 (55%)                                   | N/A                                                             | N/A                                                         |
| <b>Diastolic function</b>                        |                                                        |                                               |                                            |                                                                 |                                                             |
| E-wave velocity (m/s)                            | 0.6 (0.6-0.8)                                          | 0.8 (0.6-0.9)                                 | 0.9 (0.7-1.0)                              | 0.004                                                           | 0.350                                                       |
| A-wave velocity (m/s)*                           | 0.6 (0.5-0.8)                                          | 0.7 (0.6-0.9)                                 | 0.7 (0.5-0.9)                              | N/A                                                             | N/A                                                         |
| E/A ratio                                        | 1.0 (0.8-1.3)                                          | 1.0 (0.8-1.2)                                 | 1.1 (0.9-1.5)                              | N/A                                                             | N/A                                                         |
| Septal e' velocity (cm/s)*                       | 7.7 ± 2.0                                              | 7.7 ± 2.1                                     | 7.2 ± 2.4                                  | N/A                                                             | N/A                                                         |

|                                      |                |                 |                 |       |       |
|--------------------------------------|----------------|-----------------|-----------------|-------|-------|
| Septal E/e'                          | 8.8 (7.1-11.4) | 10.0 (7.8-12.5) | 11.7 (8.3-15.0) | 0.110 | 0.128 |
| Lateral e' velocity (cm/s)           | 10.2 ± 2.8     | 9.7 ± 2.7       | 8.6 ± 2.8       | 0.497 | 0.145 |
| Lateral E/e'                         | 6.4 (5.0-8.8)  | 8.0 (6.5-10.0)  | 10.0 (7.0-15.0) | 0.001 | 0.068 |
| <b>Right ventricle</b>               |                |                 |                 |       |       |
| Dilatation >mild, n (%)*             | 2 (2%)         | 7 (7%)          | 1 (2%)          | N/A   | N/A   |
| Dilatation > moderate                | 0 (0%)         | 1 (1%)          | 0 (0%)          | N/A   | N/A   |
| TAPSE (mm)*                          | 22 ± 5         | 22 ± 5          | 22 ± 5          | N/A   | N/A   |
| Tricuspid annular s' (cm/s)          | 12.8 ± 2.5     | 13.7 ± 2.0      | 13.4 ± 2.6      | 0.032 | 0.761 |
| <b>Mitral valve regurgitation</b>    |                |                 |                 |       |       |
| Moderate or greater*                 | 6 (7%)         | 4 (4%)          | 2 (4%)          | N/A   | N/A   |
| More than moderate*                  | 0 (0%)         | 0 (0%)          | 0 (0%)          | N/A   | N/A   |
| <b>Tricuspid valve regurgitation</b> |                |                 |                 |       |       |
| Moderate or greater                  | 8 (9%)         | 5 (5%)          | 8 (16%)         | 0.229 | 0.018 |
| More than moderate*                  | 2 (2%)         | 0 (0%)          | 1 (2%)          | N/A   | N/A   |

All 3-group comparisons were first tested using ANOVA (or Kruskal Walls H test for nonparametric distributions), if the results of this test were not significant (indicated by an asterisk), no further between group testing was performed and individual group comparison p values are indicated as N/A.

†Concentric remodelling defined as relative wall thickness >0.42

‡Left ventricular hypertrophy defined as left ventricular mass index ≥115 g/m<sup>2</sup> in men or ≥95 g/m<sup>2</sup> in women

HFpEF, heart failure with preserved ejection fraction; NT-proBNP, N-terminal pro-hormone of B-type natriuretic peptide; TAPSE, tricuspid annular plane systolic excursion.

**Supplementary Table S6. Invasive hemodynamic assessment at rest and during exercise in sensitivity analysis matched for age, hypertension, diabetes and atrial fibrillation**

|                                                           | Control subjects<br>without HFpEF<br>(n = 86) | HFpEF with<br>normal NP<br>(n = 103) | HFpEF with<br>high NP<br>(n = 49) | P-value for HFpEF<br>with normal NP<br>versus controls | P-value for HFpEF<br>with normal<br>versus high NP |
|-----------------------------------------------------------|-----------------------------------------------|--------------------------------------|-----------------------------------|--------------------------------------------------------|----------------------------------------------------|
| <b>Rest</b>                                               |                                               |                                      |                                   |                                                        |                                                    |
| Heart rate (bpm)*                                         | 73 ± 13                                       | 71 ± 11                              | 71 ± 11                           | N/A                                                    | N/A                                                |
| Systolic blood pressure (mmHg)*                           | 141 ± 23                                      | 145 ± 23                             | 145 ± 27                          | N/A                                                    | N/A                                                |
| Right atrial pressure (mmHg)                              | 5 ± 2                                         | 10 ± 4                               | 10 ± 5                            | <0.001                                                 | 0.769                                              |
| Systolic pulmonary arterial pressure (mmHg)               | 26 ± 5                                        | 36 ± 8                               | 42 ± 16                           | <0.001                                                 | 0.003                                              |
| Mean pulmonary arterial pressure (mmHg)                   | 16 ± 3                                        | 25 ± 6                               | 28 ± 10                           | <0.001                                                 | 0.018                                              |
| Pulmonary arterial wedge pressure (mmHg)                  | 9 ± 3                                         | 16 ± 5                               | 18 ± 6                            | <0.001                                                 | 0.004                                              |
| Left ventricular transmural pressure (mmHg)               | 4 ± 2                                         | 5 ± 4                                | 8 ± 4                             | 0.018                                                  | <0.001                                             |
| Cardiac output (L/min)*                                   | 5.73 ± 1.78                                   | 5.82 ± 1.68                          | 5.40 ± 1.66                       | N/A                                                    | N/A                                                |
| Cardiac index (L/min/m <sup>2</sup> )                     | 2.84 ± 0.81                                   | 2.62 ± 0.66                          | 2.51 ± 0.59                       | 0.080                                                  | 0.659                                              |
| Stroke volume index (mL/m <sup>2</sup> )                  | 39.7 ± 10.4                                   | 36.9 ± 8.5                           | 35.9 ± 9.2                        | 0.106                                                  | 0.808                                              |
| Systemic vascular resistance (dynes.s.cm <sup>-5</sup> )* | 1,376 ± 395                                   | 1,348 ± 395                          | 1,430 ± 445                       | N/A                                                    | N/A                                                |
| Total arterial compliance (mL/mmHg)*                      | 1.20 (0.92-1.50)                              | 1.22 (0.93-1.49)                     | 1.02 (0.81-1.43)                  | N/A                                                    | N/A                                                |
| Effective arterial elastance (mmHg/mL)*                   | 1.70 ± 0.57                                   | 1.70 ± 0.49                          | 1.85 ± 0.66                       | N/A                                                    | N/A                                                |
| Pulmonary vascular resistance (WU)                        | 1.3 (0.9-1.7)                                 | 1.6 (1.0-2.2)                        | 1.7 (1.0-2.6)                     | 0.031                                                  | 0.783                                              |
| Pulmonary arterial compliance (mL/mmHg)                   | 5.20 ± 1.86                                   | 4.54 ± 2.02                          | 3.88 ± 1.93                       | 0.056                                                  | 0.127                                              |

| <b>Peak exercise</b>                                     |               |               |               |        |        |  |
|----------------------------------------------------------|---------------|---------------|---------------|--------|--------|--|
| Heart rate (bpm)                                         | 115 ± 23      | 109 ± 18      | 102 ± 22      | 0.098  | 0.212  |  |
| Systolic blood pressure (mmHg)*                          | 175 ± 32      | 185 ± 29      | 184 ± 37      | N/A    | N/A    |  |
| Right atrial pressure (mmHg)                             | 7 ± 3         | 18 ± 7        | 20 ± 7        | <0.001 | 0.050  |  |
| Systolic pulmonary arterial pressure (mmHg)              | 39 ± 9        | 59 ± 13       | 66 ± 16       | <0.001 | 0.007  |  |
| Mean pulmonary arterial pressure (mmHg)                  | 25 ± 6        | 42 ± 10       | 47 ± 11       | <0.001 | 0.003  |  |
| Pulmonary arterial wedge pressure (mmHg)                 | 14 ± 5        | 31 ± 6        | 34 ± 6        | <0.001 | 0.013  |  |
| Left ventricular transmural pressure (mmHg)              | 7 ± 3         | 14 ± 5        | 14 ± 5        | <0.001 | 0.903  |  |
| Arterial oxygen saturation (%)                           | 97 (96-98)    | 96 (94-97)    | 95 (92-97)    | <0.001 | 0.170  |  |
| Cardiac output (L/min)                                   | 11.3 ± 3.13   | 11.4 ± 3.23   | 8.67 ± 2.53   | 0.974  | <0.001 |  |
| Cardiac index (L/min/m <sup>2</sup> )                    | 5.59 ± 1.47   | 5.16 ± 1.41   | 4.11 ± 1.10   | 0.108  | <0.001 |  |
| Stroke volume index (mL/m <sup>2</sup> )                 | 48.0 ± 11.3   | 47.6 ± 12.4   | 40.6 ± 10.4   | 0.972  | 0.003  |  |
| Systemic vascular resistance (dynes.s.cm <sup>-5</sup> ) | 786 ± 271     | 784 ± 294     | 972 ± 358     | 0.999  | 0.012  |  |
| Pulmonary vascular resistance (WU)                       | 1.0 (0.8-1.3) | 1.0 (0.5-1.4) | 1.5 (0.8-2.1) | 1.0    | 0.002  |  |

All 3-group comparisons were first tested using ANOVA (or Kruskal Walls H test for nonparametric distributions), if the results of this test were not significant (indicated by an asterisk), no further between group testing was performed and individual group comparison p values are indicated as N/A.

HFpEF, heart failure with preserved ejection fraction; NT-proBNP, N-terminal pro-hormone of B-type natriuretic peptide.

**Supplementary Table S7. Baseline characteristics of the study population in sensitivity analysis with elevated NT-proBNP cut-off >220 ng/L in sinus rhythm and >660 ng/L in atrial fibrillation**

|                                         | <b>Control subjects<br/>without HFpEF<br/>(n = 161)</b> | <b>HFpEF with<br/>normal NP<br/>(n = 253)</b> | <b>HFpEF with<br/>high NP<br/>(n = 167)</b> | <b>P-value for HFpEF<br/>with normal NP<br/>versus controls</b> | <b>P-value for HFpEF<br/>with normal<br/>versus high NP</b> |
|-----------------------------------------|---------------------------------------------------------|-----------------------------------------------|---------------------------------------------|-----------------------------------------------------------------|-------------------------------------------------------------|
| Age (years)                             | 54 ± 13                                                 | 65 ± 11                                       | 73 ± 9                                      | <0.001                                                          | <0.001                                                      |
| Men/women*                              | 45/55%                                                  | 42/58%                                        | 39/61%                                      | N/A                                                             | N/A                                                         |
| Body mass index (kg/m <sup>2</sup> )    | 27.7 ± 5.2                                              | 34.7 ± 8.0                                    | 31.2 ± 6.4                                  | <0.001                                                          | <0.001                                                      |
| Left ventricular ejection fraction (%)* | 65 ± 5                                                  | 65 ± 6                                        | 64 ± 6                                      | N/A                                                             | N/A                                                         |
| <b>Comorbidities</b>                    |                                                         |                                               |                                             |                                                                 |                                                             |
| Hypertension                            | 63%                                                     | 92%                                           | 96%                                         | <0.001                                                          | 0.156                                                       |
| Diabetes                                | 13%                                                     | 26%                                           | 30%                                         | 0.002                                                           | 0.372                                                       |
| Obesity                                 | 32%                                                     | 72%                                           | 54%                                         | <0.001                                                          | <0.001                                                      |
| Coronary artery disease                 | 18%                                                     | 30%                                           | 38%                                         | 0.008                                                           | 0.072                                                       |
| Paroxysmal AF                           | 5%                                                      | 8%                                            | 32%                                         | <0.001                                                          | <0.001                                                      |
| Persistent/permanent AF                 | 1%                                                      | 9%                                            | 46%                                         | <0.001                                                          | <0.001                                                      |
| COPD                                    | 6%                                                      | 16%                                           | 12%                                         | 0.002                                                           | 0.319                                                       |
| <b>Laboratory results</b>               |                                                         |                                               |                                             |                                                                 |                                                             |
| NT-proBNP (ng/L)†                       | 73 (30-144)                                             | 125 (57-278)                                  | 1,279 (825-2,156)                           | <0.001                                                          | N/A                                                         |
| Hemoglobin (g/dL)                       | 13.6 ± 1.5                                              | 13.2 ± 1.5                                    | 12.7 ± 1.7                                  | 0.012                                                           | 0.003                                                       |
| eGFR (mL/min/1.73m <sup>2</sup> )       | 79 ± 20                                                 | 69 ± 18                                       | 53 ± 19                                     | <0.001                                                          | <0.001                                                      |

|                                      |            |            |            |        |        |
|--------------------------------------|------------|------------|------------|--------|--------|
| Medication use                       |            |            |            |        |        |
| Renin-angiotensin system blocker     | 26%        | 44%        | 52%        | <0.001 | 0.135  |
| Beta blocker                         | 24%        | 47%        | 69%        | <0.001 | <0.001 |
| Diuretic                             | 22%        | 55%        | 77%        | <0.001 | <0.001 |
| Continuous H <sub>2</sub> FPEF score | 34 (16-48) | 77 (57-92) | 96 (89-99) | <0.001 | <0.001 |
| probability (%)†,‡                   |            |            |            |        |        |
| HFA-PEFF score†,‡                    | 2 (1-3)    | 3 (2-3)    | 6 (5-6)    | <0.001 | <0.001 |

All 3-group comparisons were first tested using ANOVA (or Kruskal Walls H test for nonparametric distributions), if the results of this test were not significant (indicated by an asterisk), no further between group testing was performed and individual group comparison p values are indicated as N/A.

†Reported as median (interquartile range)

‡Continuous H<sub>2</sub>FPEF score probability as determined from Reference [4] and HFA-PEFF score as determined from Reference [12]

AF, atrial fibrillation; COPD, chronic obstructive pulmonary disease; eGFR, estimated glomerular filtration rate according to the Chronic Kidney Disease Epidemiology Collaboration formula; HFpEF, heart failure with preserved ejection fraction; NP, natriuretic peptides; NT-proBNP, N-terminal pro-hormone of B-type natriuretic peptide.

**Supplementary Table S8. Cardiac structure and function in sensitivity analysis with elevated NT-proBNP cut-off >220 ng/L in sinus rhythm and >660 ng/L in atrial fibrillation**

|                                                 | <b>Control subjects<br/>without HFpEF<br/>(n = 161)</b> | <b>HFpEF with<br/>normal NP<br/>(n = 253)</b> | <b>HFpEF with<br/>high NP<br/>(n = 167)</b> | <b>P-value for HFpEF<br/>with normal NP<br/>versus controls</b> | <b>P-value for HFpEF<br/>with normal versus<br/>high NP</b> |
|-------------------------------------------------|---------------------------------------------------------|-----------------------------------------------|---------------------------------------------|-----------------------------------------------------------------|-------------------------------------------------------------|
| <b>Dimensions</b>                               |                                                         |                                               |                                             |                                                                 |                                                             |
| Interventricular septal thickness (mm)          | 9.7 ± 1.5                                               | 10.8 ± 1.8                                    | 11.0 ± 2.1                                  | <0.001                                                          | 0.352                                                       |
| Posterior wall thickness (mm)                   | 9.5 ± 1.4                                               | 10.2 ± 1.6                                    | 10.3 ± 1.6                                  | <0.001                                                          | 0.558                                                       |
| Left ventricular end-diastolic diameter (mm)*   | 48 ± 5                                                  | 49 ± 5                                        | 49 ± 5                                      | N/A                                                             | N/A                                                         |
| Left ventricular end-systolic diameter (mm)*    | 31 ± 4                                                  | 32 ± 5                                        | 32 ± 4                                      | N/A                                                             | N/A                                                         |
| Left atrial volume (mL)                         | 52 (42-67)                                              | 62 (50-78)                                    | 89 (68-108)                                 | <0.001                                                          | <0.001                                                      |
| Left atrial volume index (mL/m <sup>2</sup> )   | 27 (22-32)                                              | 29 (24-37)                                    | 43 (35-56)                                  | 0.010                                                           | <0.001                                                      |
| <b>Left ventricular hypertrophy indices</b>     |                                                         |                                               |                                             |                                                                 |                                                             |
| Relative wall thickness                         | 0.40 ± 0.06                                             | 0.42 ± 0.07                                   | 0.43 ± 0.08                                 | 0.014                                                           | 0.187                                                       |
| Concentric remodelling†                         | 30%                                                     | 43%                                           | 48%                                         | 0.005                                                           | 0.373                                                       |
| Left ventricular mass (g)                       | 166 ± 47                                                | 193 ± 58                                      | 193 ± 56                                    | <0.001                                                          | 0.998                                                       |
| Left ventricular mass index (g/m <sup>2</sup> ) | 84 ± 18                                                 | 89 ± 22                                       | 96 ± 24                                     | 0.042                                                           | 0.010                                                       |
| Left ventricular hypertrophy‡                   | 38%                                                     | 57%                                           | 62%                                         | <0.001                                                          | 0.311                                                       |
| <b>Diastolic function</b>                       |                                                         |                                               |                                             |                                                                 |                                                             |
| E-wave velocity (m/s) (n=579)                   | 0.7 (0.6-0.8)                                           | 0.8 (0.7-0.9)                                 | 1.0 (0.8-1.2)                               | <0.001                                                          | <0.001                                                      |
| A-wave velocity (m/s) (n=579)                   | 0.6 (0.5-0.8)                                           | 0.7 (0.6-0.9)                                 | 0.3 (0-0.8)                                 | <0.001                                                          | <0.001                                                      |
| E/A ratio (n=486)                               | 1.17 (0.83-1.43)                                        | 1.00 (0.75-1.20)                              | 1.33 (0.88-2.00)                            | 0.003                                                           | <0.001                                                      |
| Septal e' velocity (cm/s) (n=571)               | 8.5 ± 2.5                                               | 7.2 ± 2.0                                     | 6.5 ± 2.0                                   | <0.001                                                          | 0.006                                                       |

|                                      |                |                 |                  |        |        |
|--------------------------------------|----------------|-----------------|------------------|--------|--------|
| Septal E/e' (n=571)                  | 8.3 (6.7-10.0) | 10.0 (8.6-14.0) | 15.0 (11.3-22.0) | <0.001 | <0.001 |
| Lateral e' velocity (cm/s) (n=515)   | 11.2 ± 3.4     | 8.8 ± 2.7       | 8.5 ± 2.6        | <0.001 | 0.671  |
| Lateral E/e' (n=515)                 | 6.0 (5.0-7.8)  | 8.9 (7.0-11.7)  | 11.2 (8.7-16.4)  | <0.001 | <0.001 |
| <b>Right ventricle</b>               |                |                 |                  |        |        |
| Dilatation >mild                     | 3.1%           | 6.7%            | 24.0%            | 0.122  | <0.001 |
| Dilatation > moderate                | 0.6%           | 0.8%            | 7.2%             | 1.000  | <0.001 |
| TAPSE (mm) (n=334)                   | 22 ± 5         | 22 ± 5          | 19 ± 5           | 0.932  | <0.001 |
| Tricuspid annular s' (cm/s) (n=481)  | 13.1 ± 2.6     | 13.1 ± 2.6      | 11.3 ± 3.0       | 0.994  | <0.001 |
| <b>Mitral valve regurgitation</b>    |                |                 |                  |        |        |
| Mild or greater                      | 6.2%           | 8.3%            | 30.5%            | 0.566  | <0.001 |
| More than moderate                   | 0.6%           | 0.4%            | 3.0%             | 1.000  | 0.039  |
| <b>Tricuspid valve regurgitation</b> |                |                 |                  |        |        |
| Mild or greater                      | 6.8%           | 14.2%           | 49.7%            | 0.025  | <0.001 |
| More than moderate                   | 1.9%           | 2.4%            | 21.6%            | 1.000  | <0.001 |

All 3-group comparisons were first tested using ANOVA (or Kruskal Walls H test for nonparametric distributions), if the results of this test were not significant (indicated by an asterisk), no further between group testing was performed and individual group comparison p values are indicated as N/A.

†Concentric remodelling defined as relative wall thickness >0.42

‡Left ventricular hypertrophy defined as left ventricular mass index ≥115 g/m<sup>2</sup> in men or ≥95 g/m<sup>2</sup> in women

HFpEF, heart failure with preserved ejection fraction; NT-proBNP, N-terminal pro-hormone of B-type natriuretic peptide; TAPSE, tricuspid annular plane systolic excursion.



**Supplementary Table S9. Invasive hemodynamic assessment at rest and during exercise in sensitivity analysis with elevated NT-proBNP cut-off >220 ng/L in sinus rhythm and >660 ng/L in atrial fibrillation**

|                                                          | Control subjects<br>without HFpEF<br>(n = 161) | HFpEF with<br>normal NP<br>(n = 253) | HFpEF with<br>high NP<br>(n = 167) | P-value for HFpEF<br>with normal NP<br>versus controls | P-value for HFpEF<br>with normal<br>versus high NP |
|----------------------------------------------------------|------------------------------------------------|--------------------------------------|------------------------------------|--------------------------------------------------------|----------------------------------------------------|
| <b>Rest</b>                                              |                                                |                                      |                                    |                                                        |                                                    |
| Heart rate (bpm)                                         | 74 ± 13                                        | 70 ± 12                              | 70 ± 13                            | 0.016                                                  | 0.997                                              |
| Systolic blood pressure (mmHg)                           | 135 ± 23                                       | 147 ± 23                             | 147 ± 26                           | <0.001                                                 | 0.940                                              |
| Right atrial pressure (mmHg)                             | 5 ± 2                                          | 10 ± 4                               | 12 ± 5                             | <0.001                                                 | <0.001                                             |
| Systolic pulmonary arterial pressure (mmHg)              | 26 ± 6                                         | 38 ± 11                              | 50 ± 16                            | <0.001                                                 | <0.001                                             |
| Mean pulmonary arterial pressure (mmHg)                  | 16 ± 3                                         | 26 ± 7                               | 33 ± 10                            | <0.001                                                 | <0.001                                             |
| Pulmonary arterial wedge pressure (mmHg)                 | 9 ± 3                                          | 16 ± 5                               | 19 ± 6                             | <0.001                                                 | <0.001                                             |
| Left ventricular transmural pressure (mmHg)              | 4 ± 2                                          | 6 ± 4                                | 7 ± 5                              | <0.001                                                 | 0.003                                              |
| Cardiac output (L/min)                                   | 5.70 ± 1.65                                    | 5.44 ± 1.66                          | 4.54 ± 1.37                        | 0.245                                                  | <0.001                                             |
| Cardiac index (L/min/m <sup>2</sup> )                    | 2.93 ± 0.80                                    | 2.54 ± 0.66                          | 2.26 ± 0.63                        | <0.001                                                 | <0.001                                             |
| Stroke volume index (mL/m <sup>2</sup> )                 | 40.4 ± 10.4                                    | 36.7 ± 9.6                           | 33.0 ± 10.2                        | <0.001                                                 | <0.001                                             |
| Systemic vascular resistance (dynes.s.cm <sup>-5</sup> ) | 1,318 ± 379                                    | 1,443 ± 465                          | 1,648 ± 613                        | 0.033                                                  | <0.001                                             |
| Total arterial compliance (mL/mmHg)                      | 1.26 (0.97-1.60)                               | 1.07 (0.81-1.40)                     | 0.87 (0.60-1.12)                   | <0.001                                                 | <0.001                                             |
| Effective arterial elastance (mmHg/mL)                   | 1.66 ± 0.56                                    | 1.83 ± 0.61                          | 2.25 ± 0.93                        | 0.057                                                  | <0.001                                             |
| Pulmonary vascular resistance (WU)                       | 1.3 (0.9-1.7)                                  | 1.7 (1.1-2.5)                        | 2.9 (1.7-4.1)                      | <0.001                                                 | <0.001                                             |
| Pulmonary arterial compliance (mL/mmHg)                  | 5.18 ± 2.04                                    | 4.07 ± 1.87                          | 2.61 ± 1.22                        | <0.001                                                 | <0.001                                             |

| <b>Peak exercise</b>                                     |               |               |               |        |        |  |
|----------------------------------------------------------|---------------|---------------|---------------|--------|--------|--|
| Heart rate (bpm)                                         | 119 ± 23      | 105 ± 20      | 95 ± 22       | <0.001 | <0.001 |  |
| Systolic blood pressure (mmHg)                           | 170 ± 33      | 185 ± 32      | 168 ± 33      | <0.001 | <0.001 |  |
| Right atrial pressure (mmHg)                             | 7 ± 4         | 19 ± 7        | 23 ± 8        | <0.001 | <0.001 |  |
| Systolic pulmonary arterial pressure (mmHg)              | 39 ± 9        | 64 ± 15       | 72 ± 17       | <0.001 | <0.001 |  |
| Mean pulmonary arterial pressure (mmHg)                  | 25 ± 6        | 45 ± 10       | 49 ± 10       | <0.001 | <0.001 |  |
| Pulmonary arterial wedge pressure (mmHg)                 | 15 ± 5        | 32 ± 6        | 32 ± 6        | <0.001 | 0.836  |  |
| Left ventricular transmural pressure (mmHg)              | 7 ± 4         | 13 ± 6        | 9 ± 9         | <0.001 | <0.001 |  |
| Arterial oxygen saturation (%)                           | 97 (95-98)    | 95 (93-97)    | 95 (92-97)    | <0.001 | 0.116  |  |
| Cardiac output (L/min)                                   | 11.48 ± 3.29  | 9.86 ± 3.15   | 6.80 ± 2.26   | <0.001 | <0.001 |  |
| Cardiac index (L/min/m <sup>2</sup> )                    | 5.87 ± 1.59   | 4.61 ± 1.35   | 3.38 ± 1.05   | <0.001 | <0.001 |  |
| Stroke volume index (mL/m <sup>2</sup> )                 | 49.6 ± 12.7   | 44.4 ± 13.4   | 36.7 ± 11.4   | <0.001 | <0.001 |  |
| Systemic vascular resistance (dynes.s.cm <sup>-5</sup> ) | 759 ± 263     | 906 ± 364     | 1,075 ± 392   | 0.002  | <0.001 |  |
| Pulmonary vascular resistance (WU)                       | 0.9 (0.7-1.2) | 1.3 (0.8-2.0) | 2.2 (1.4-3.8) | <0.001 | <0.001 |  |

All 3-group comparisons were first tested using ANOVA (or Kruskal Walls H test for nonparametric distributions), if the results of this test were not significant (indicated by an asterisk), no further between group testing was performed and individual group comparison p values are indicated as N/A.

HFpEF, heart failure with preserved ejection fraction; NT-proBNP, N-terminal pro-hormone of B-type natriuretic peptide.

**Supplementary Figure S1. Study flowchart.**

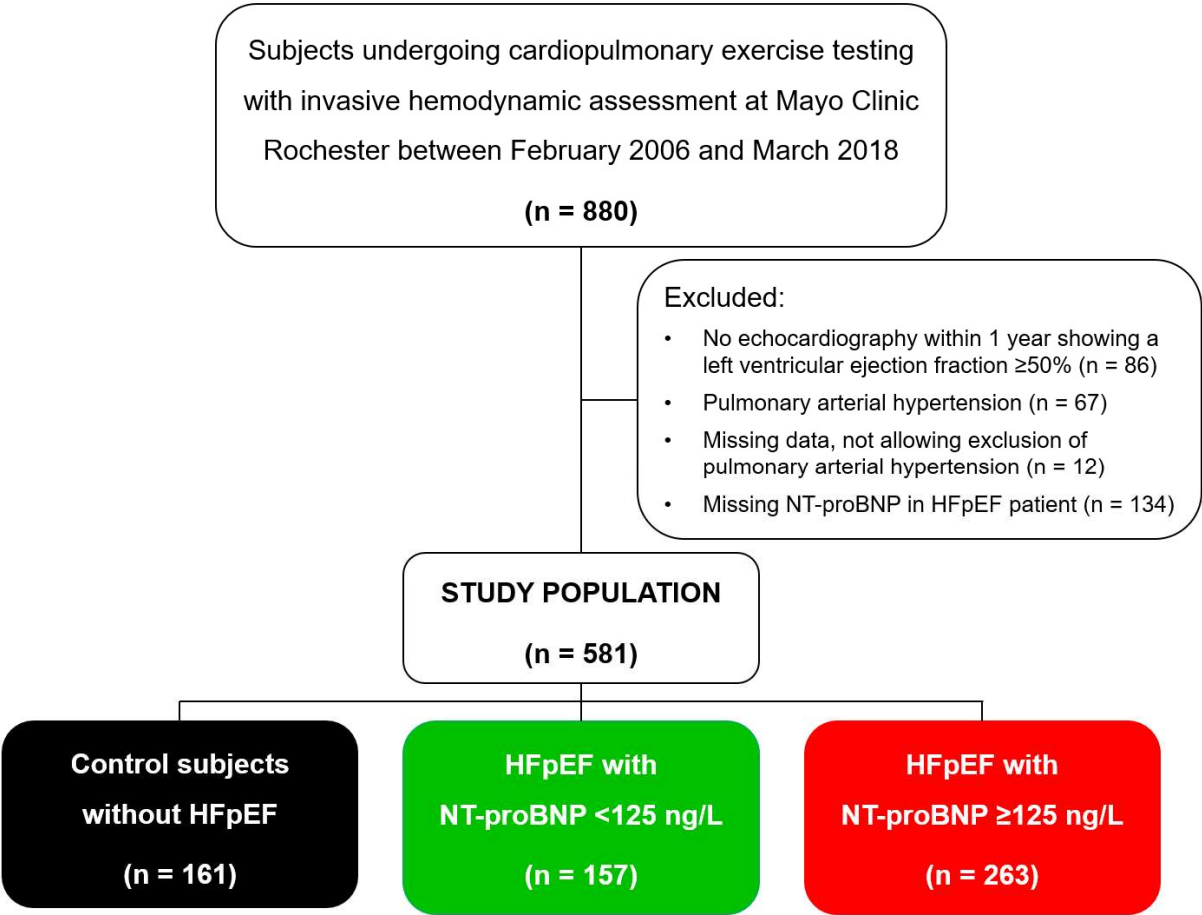

**Supplementary Figure S2. Cardiac output increase from rest to exercise as a function of left ventricular preload reflected by LVTMP.**

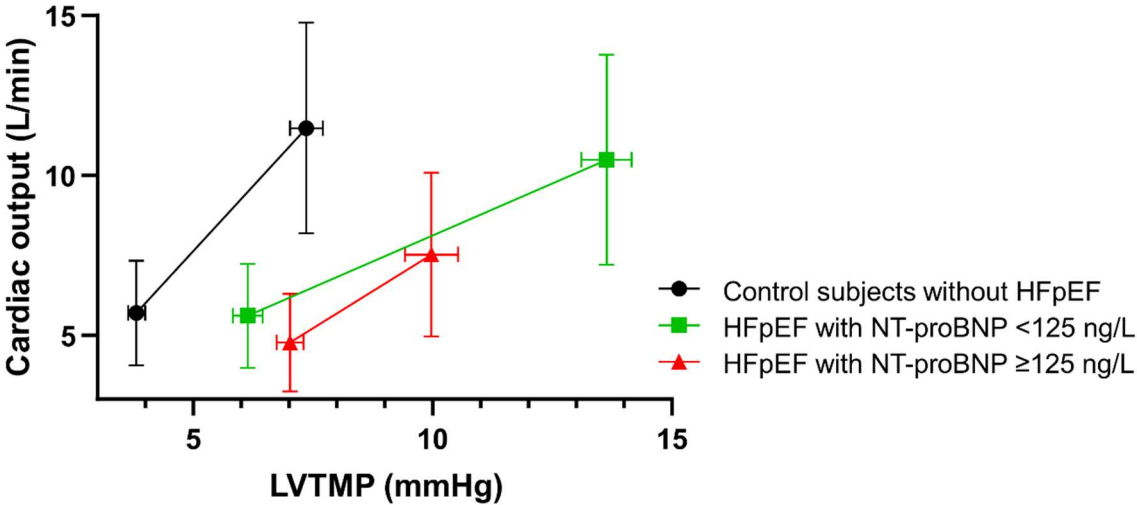

Bars indicating mean with standard deviations

Supplementary Figure S3: Freedom from all-cause mortality or heart failure readmissions in control subjects, patients with HFpEF and NT-proBNP <125 ng/L versus ≥125 ng/L in sensitivity analysis matched for age, hypertension, diabetes and atrial fibrillation.

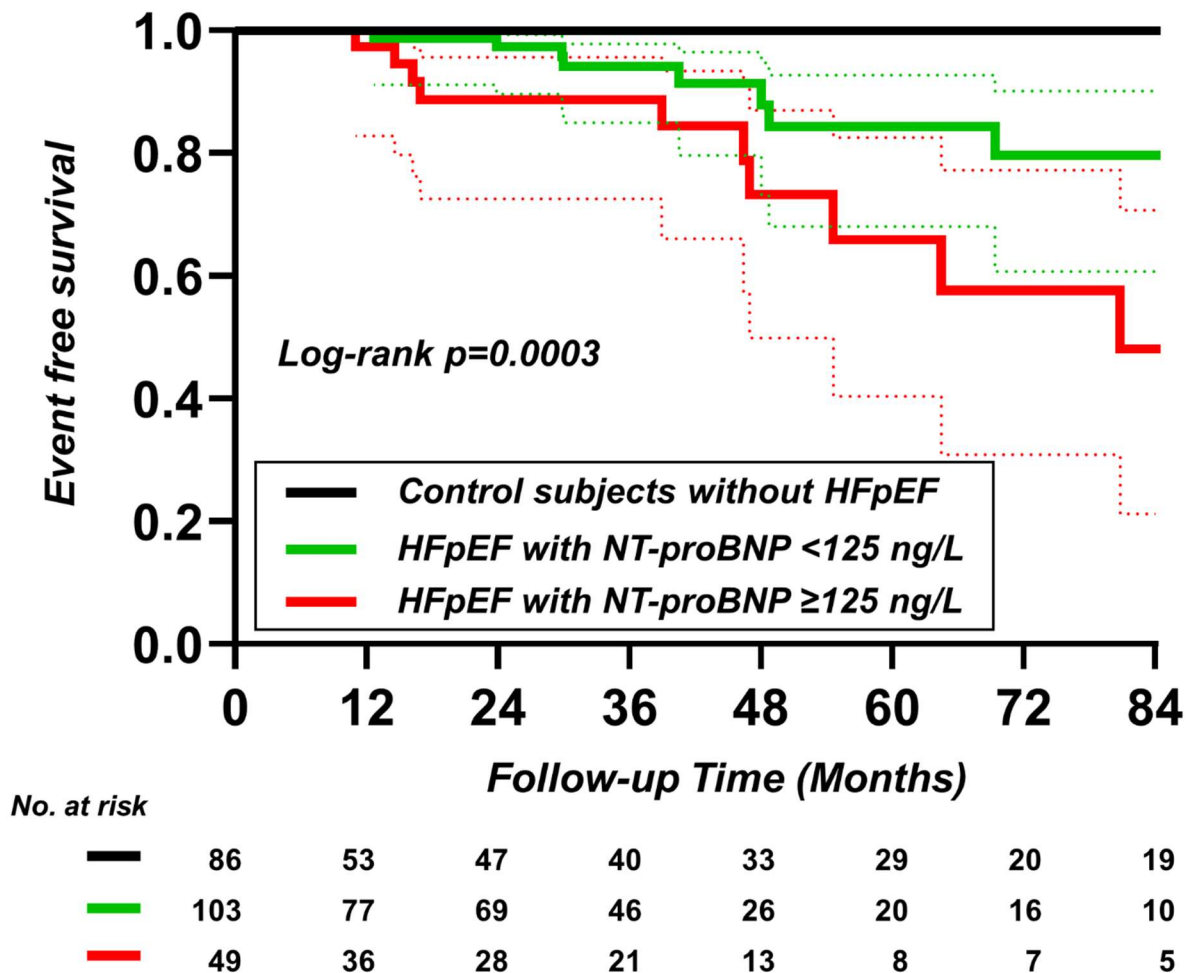

HFpEF, heart failure with preserved ejection fraction; NT proBNP, N terminal pro hormone of B type natriuretic peptide.

Supplementary Figure S4: (A.) Left ventricular mass index, (B.) left atrial volume index, (C.) septal  $e'$  velocity, and (D.) septal  $E/e'$  ratio in control subjects (black dots), patients with HFpEF and low NT proBNP (green squares), and patients with HFpEF and high NT proBNP (red triangles). Sensitivity analysis with elevated NT proBNP cut-off  $>220$  ng/L in sinus rhythm and  $>660$  ng/L in atrial fibrillation.

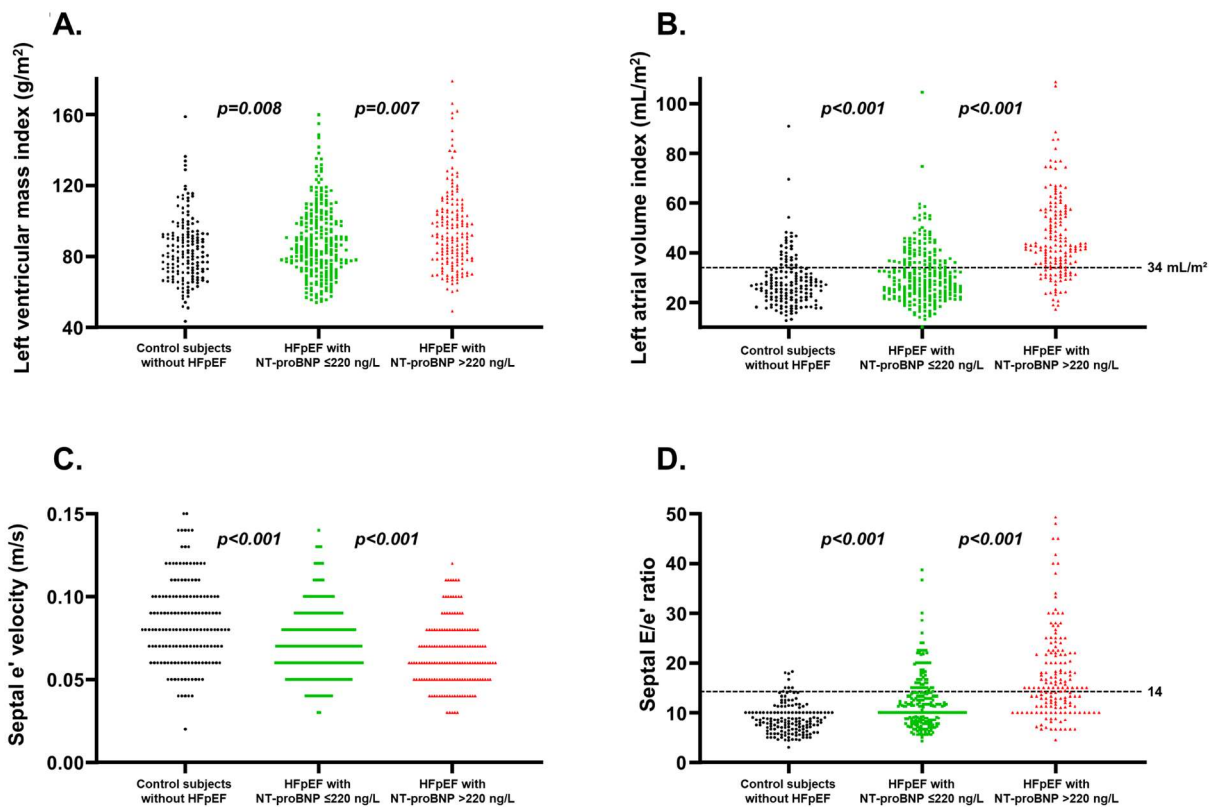

E, transmitral early velocity on pulsed-wave Doppler;  $e'$ , septal mitral annular early velocity on pulsed-wave tissue Doppler; HFpEF, heart failure with preserved ejection fraction; NT-proBNP, N-terminal pro-hormone of B-type natriuretic peptide.

Supplementary Figure S5: (A.) RV dilation, (B.) TAPSE, (C.) MR, and (D.) TR in control subjects (black dots), patients with HFpEF and low NT proBNP (green squares), and patients with HFpEF and high NT proBNP (red triangles). Sensitivity analysis with elevated NT proBNP cut-off >220 ng/L in sinus rhythm and >660 ng/L in atrial fibrillation.

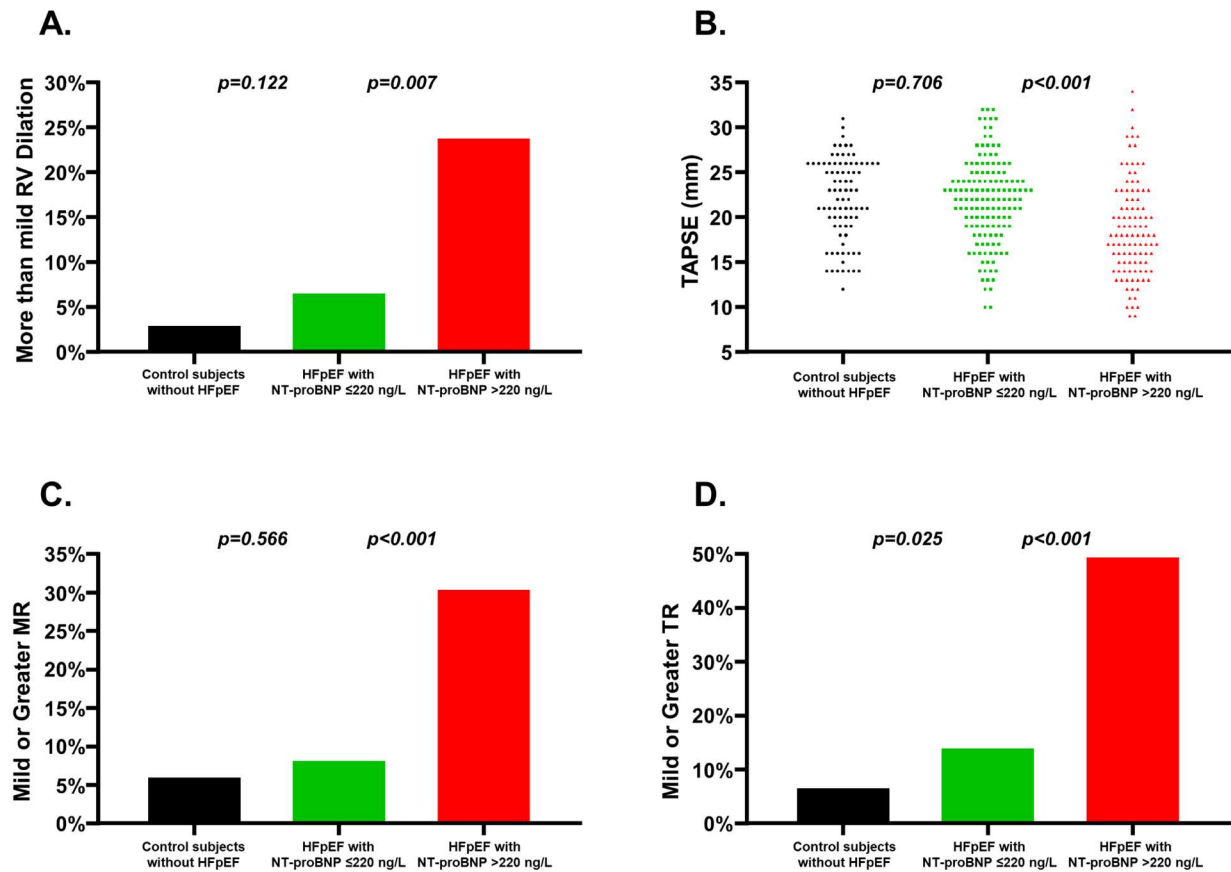

HFpEF, heart failure with preserved ejection fraction; MR, mitral valve regurgitation; NT-proBNP, N-terminal pro-hormone of B-type natriuretic peptide; RV, right ventricular; TAPSE, tricuspid annular plane systolic excursion; TR, tricuspid valve regurgitation.

Supplementary Figure S6. (A.) mPAP at rest; (B.) PVR at rest; (C.) mPAP at peak exercise; and (D.) PVR at peak exercise in control subjects (black dots), patients with HFpEF and low NT proBNP (green squares), and patients with HFpEF and high NT proBNP (red triangles). Sensitivity analysis with elevated NT proBNP cut-off >220 ng/L in sinus rhythm and >660 ng/L in atrial fibrillation.

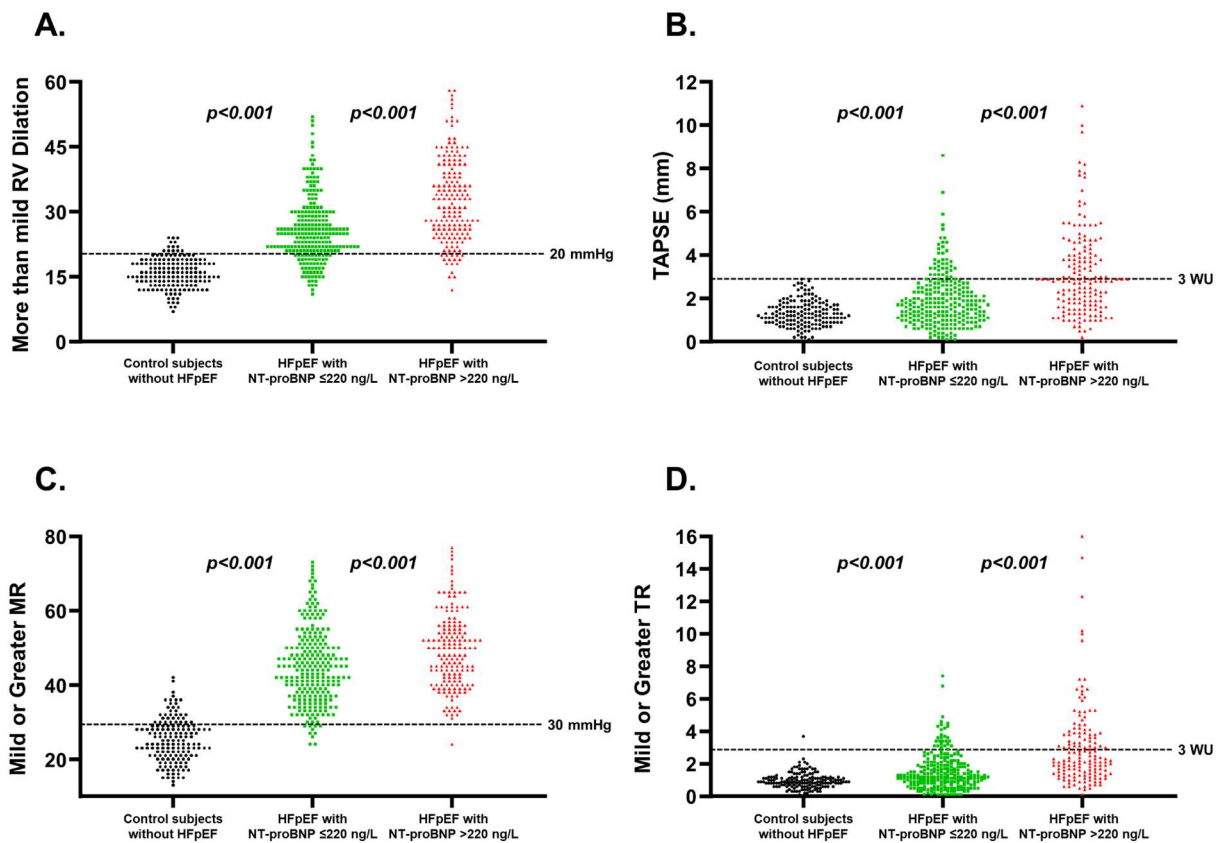

HFpEF, heart failure with preserved ejection fraction; mPAP, mean pulmonary arterial pressure; NT-proBNP, N-terminal pro-hormone of B-type natriuretic peptide; PVR, pulmonary vascular resistance.



Supplementary Figure S7. Freedom from all-cause mortality or heart failure readmission in control subjects, patients with HFpEF and low NT proBNP, and patients with HFpEF and high NT proBNP. Sensitivity analysis with elevated NT proBNP cut-off >220 ng/L in sinus rhythm and >660 ng/L in atrial fibrillation.

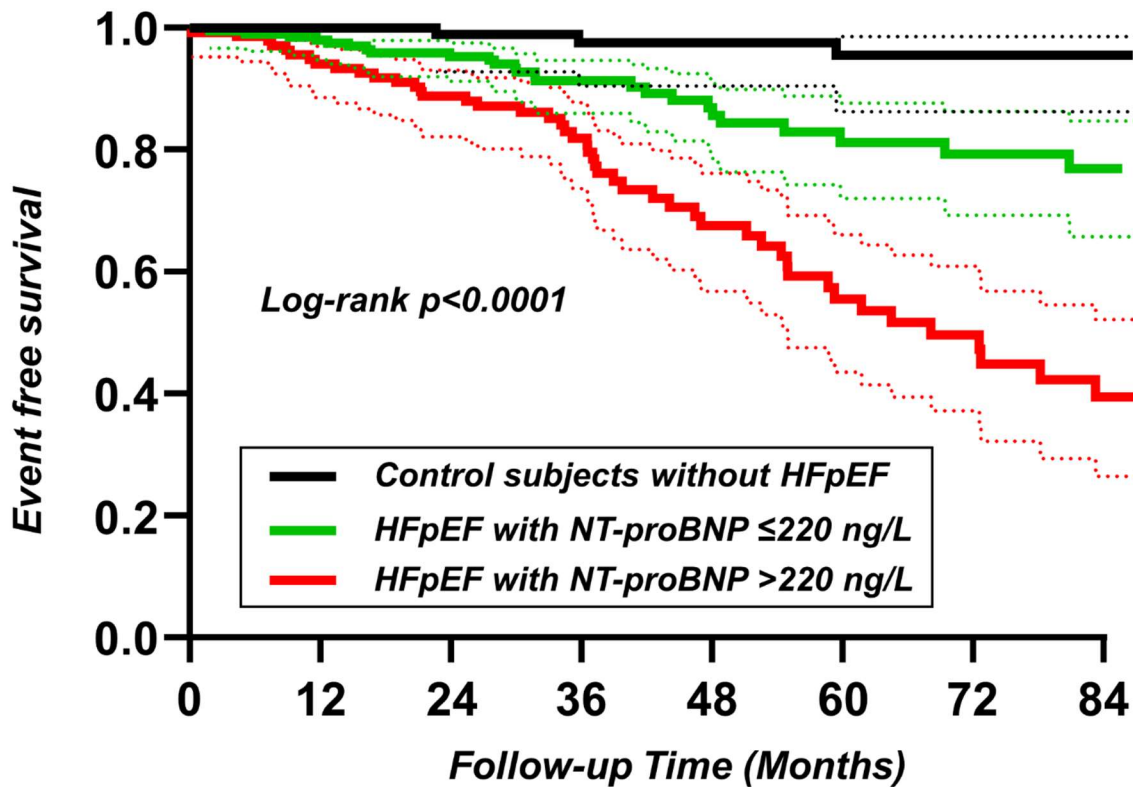

No. at risk

|   |     |     |     |     |    |    |    |    |
|---|-----|-----|-----|-----|----|----|----|----|
| — | 161 | 105 | 94  | 71  | 57 | 47 | 35 | 29 |
| — | 253 | 194 | 167 | 111 | 70 | 48 | 40 | 29 |
| — | 167 | 126 | 112 | 73  | 44 | 30 | 21 | 14 |

HFpEF, heart failure with preserved ejection fraction; NT-proBNP, N-terminal pro-hormone of B-type natriuretic peptide.
